# Supplementary material
Source: MDPI journal article supplement (https://www.mdpi.com/2297-8739/8/10/180)
Supplement: s1 [file s1]

*Article*

# **1,2-Propylene Glycol: A Biomarker of Exposure Specific to e-Cigarette Consumption**

**Therese Burkhardt <sup>1</sup>, Nikola Pluym <sup>1</sup>, Gerhard Scherer <sup>1</sup> and Max Scherer <sup>1,\*</sup>**

<sup>1</sup> ABF Analytisch-Biologisches Forschungslabor GmbH, Semmelweisstr. 5, 82152 Planegg, Germany; [therese.burkhardt@abf-lab.com](mailto:therese.burkhardt@abf-lab.com); [nikola.pluym@abf-lab.com](mailto:nikola.pluym@abf-lab.com); [gerhard.scherer@abf-lab.com](mailto:gerhard.scherer@abf-lab.com)

\* Correspondence: [max.scherer@abf-lab.com](mailto:max.scherer@abf-lab.com)

**Table S1.** Method validation parameters for the determination of propylene glycol and glycerol in urine and plasma

| Analyte          | Parameter                                  | Plasma                                                                | Urine                                                                  |
|------------------|--------------------------------------------|-----------------------------------------------------------------------|------------------------------------------------------------------------|
| Propylene glycol | Accuracy LLOQ (N = 18)                     | 0.1 µg/mL<br>92.2 %                                                   | 0.1 µg/mL<br>100.1 %                                                   |
|                  | Calibration range                          | 0.1 – 150.0 µg/mL                                                     | 0.1 – 150.0 µg/mL                                                      |
|                  | Accuracy (N= 5)*                           | 0.5 µg/mL: 97.0 %                                                     | 0.5 µg/mL: 97.0 %                                                      |
|                  |                                            | 5.0 µg/mL: 101.2 %                                                    | 5.0 µg/mL: 101.2 %                                                     |
|                  |                                            | 100 µg/mL: 99.9 %                                                     | 100 µg/mL: 99.9 %                                                      |
|                  | Intraday precision (N= 5)                  | 0.9 µg/mL: 8.5 %                                                      | 0.3 µg/mL: 18.0 %                                                      |
|                  |                                            | 5.2 mg/mL: 3.9 %                                                      | 7.8 µg/mL: 9.4 %                                                       |
|                  |                                            | 84.0 µg/mL: 2.0 %                                                     | 117.2 µg/mL: 7.8 %                                                     |
|                  | Interday precision (N= 6)                  | 0.9 µg/mL: 11.0 %                                                     | 0.3 µg/mL: 13.2 %                                                      |
|                  |                                            | 5.2 mg/mL: 6.0 %                                                      | 7.8 mg/mL: 3.1 %                                                       |
|                  |                                            | 84.0 µg/mL: 7.1 %                                                     | 117.2 µg/mL: 8.8 %                                                     |
|                  | Re-injection (N= 3)                        | 0.9 µg/mL: 4.5 %                                                      | 0.3 µg/mL: 8.0 %                                                       |
|                  |                                            | 82.3 µg/mL: 2.0 %                                                     | 115.0 µg/mL: 4.6 %                                                     |
|                  | Carry-over                                 | 150 µg/mL: 0 %                                                        | 150 µg/mL: 0 %                                                         |
| Glycerol         | Short-term stability<br>(24 h, 21 °C)      | 0.9 µg/mL: 103.5 %<br>85.0 µg/mL: 109.0 %                             | 0.3 µg/mL: 108.6 %<br>117.2 µg/mL: 89.6 %                              |
|                  | Long-term stability<br>(-20 °C)            | 1.0 µg/mL: 21 months<br>6.2 µg/mL: 21 months<br>89.0 µg/mL: 21 months | 0.3 µg/mL: 26 months<br>7.3 µg/mL: 34 months<br>112.0 µg/mL: 34 months |
|                  | Freeze-thaw stability<br>(6 cycles)        | 0.9 µg/mL: 101.0 %<br>85.0 µg/mL: 107.4 %                             | 0.3 µg/mL: 89.5 %<br>117.2 µg/mL: 86.3 %                               |
|                  | Post preparative stability<br>(7 d, 10 °C) | 0.9 µg/mL: 94.8 %<br>85.0 µg/mL: 96.0 %                               | 0.3 µg/mL: 83.9 %<br>117.2 µg/mL: 96.6 %                               |
|                  | Accuracy LLOQ (N = 6)                      | 0.1 µg/mL<br>97.6 %                                                   | 0.1 µg/mL<br>97.6 %                                                    |
|                  | Calibration range                          | 0.1 – 150.0 µg/mL                                                     | 0.1 – 150.0 µg/mL                                                      |
|                  | Accuracy (N= 5)*                           | 0.5 µg/mL: 95.5 %                                                     | 0.5 µg/mL: 95.5 %                                                      |
|                  |                                            | 5.0 µg/mL: 92.0 %                                                     | 5.0 µg/mL: 92.0 %                                                      |
|                  |                                            | 100 µg/mL: 4.8 %                                                      | 100 µg/mL: 106.4 %                                                     |
|                  | Intraday precision (N= 5)                  | 0.3 mg/mL: 9.6 %                                                      | 0.4 µg/mL: 10.5 %                                                      |
|                  |                                            | 3.2 µg/mL: 4.0 %                                                      | 5.8 µg/mL: 11.3 %                                                      |
|                  |                                            | 72.0 µg/mL: 4.8 %                                                     | 102.2 µg/mL: 11.8 %                                                    |
|                  | Interday precision (N= 6)                  | 0.3 mg/mL: 15.2 %                                                     | 0.4 µg/mL: 5.9 %                                                       |
|                  |                                            | 3.2 µg/mL: 14.5 %                                                     | 5.8 µg/mL: 10.2 %                                                      |
|                  |                                            | 72.0 µg/mL: 3.0 %                                                     | 102.2 µg/mL: 9.3 %                                                     |
|                  | Re-injection (N= 3)                        | 1.0 µg/mL: 7.8 %                                                      | 0.5 µg/mL: 4.0 %                                                       |
|                  |                                            | 80.0 µg/mL: 3.4 %                                                     | 100 µg/mL: 6.6 %                                                       |
|                  | Carry-over                                 | 150 µg/mL: 0 %                                                        | 150 µg/mL: 0 %                                                         |
|                  | Short-term stability<br>(24 h, 21 °C)      | 0.3 mg/mL: 93.7 %<br>72.0 µg/mL: 101.5 %                              | 0.4 µg/mL: 94.8 %<br>102.2 µg/mL: 99.9 %                               |

| Analyte | Parameter                                  | Plasma                                   | Urine                                                                 |
|---------|--------------------------------------------|------------------------------------------|-----------------------------------------------------------------------|
|         | Long-term stability<br>(-20 °C)            | Under investigation                      | 0.4 µg/mL: 26 months<br>5.1 µg/mL: 34 months<br>91.0 µg/mL: 26 months |
|         | Freeze-thaw stability<br>(6 cycles)        | 0.3 mg/mL: 89.4 %<br>72.0 µg/mL: 93.7 %  | 0.4 mg/mL: 82.2 %<br>102.2 µg/mL: 99.9 %                              |
|         | Post preparative stability<br>(7 d, 10 °C) | 0.3 mg/mL: 90.7 %<br>72.0 µg/mL: 109.7 % | 0.4 mg/mL: 112.0%<br>102.2 µg/mL: 100.4 %                             |

Acceptance criteria for accuracy:  $\pm 15\%$  of nominal concentrations; except  $\pm 20\%$  at 3x LLOQ. Acceptance criteria for precision:  $\pm 15\%$  coefficient of variation (CV); except  $\pm 20\%$  CV at 3x LLOQ.

\* Accuracy tests were conducted in water since no analyte-free matrix was available.

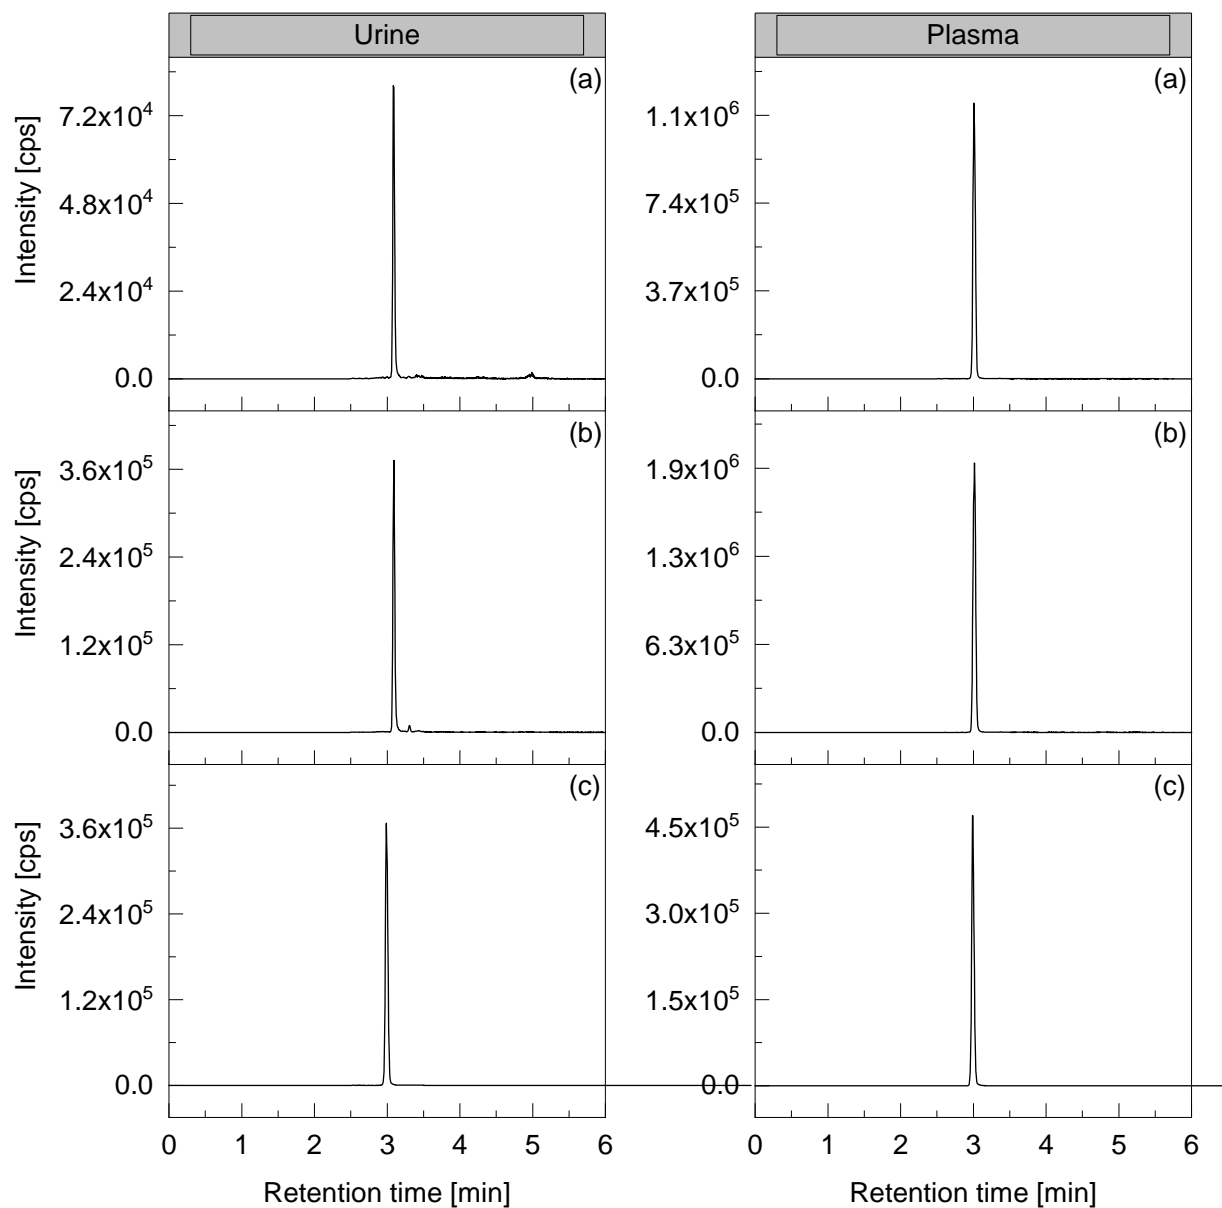

**Figure S1.** Representative chromatogram of glycerol (G) (MRM 405→283) of (a) low concentrated urine (0.21  $\mu\text{g/mL}$  G, user of oral tobacco) and plasma (9.9  $\mu\text{g/mL}$  G, non-user) samples, (b) high concentrated urine (9.7  $\mu\text{g/mL}$  G, user of e-cigarettes) and plasma (24.4  $\mu\text{g/mL}$  PG, user of e-cigarettes) samples, and (c) glycerol- $\text{d}_5$  (MRM 410→288, 2  $\mu\text{g/mL}$ ).

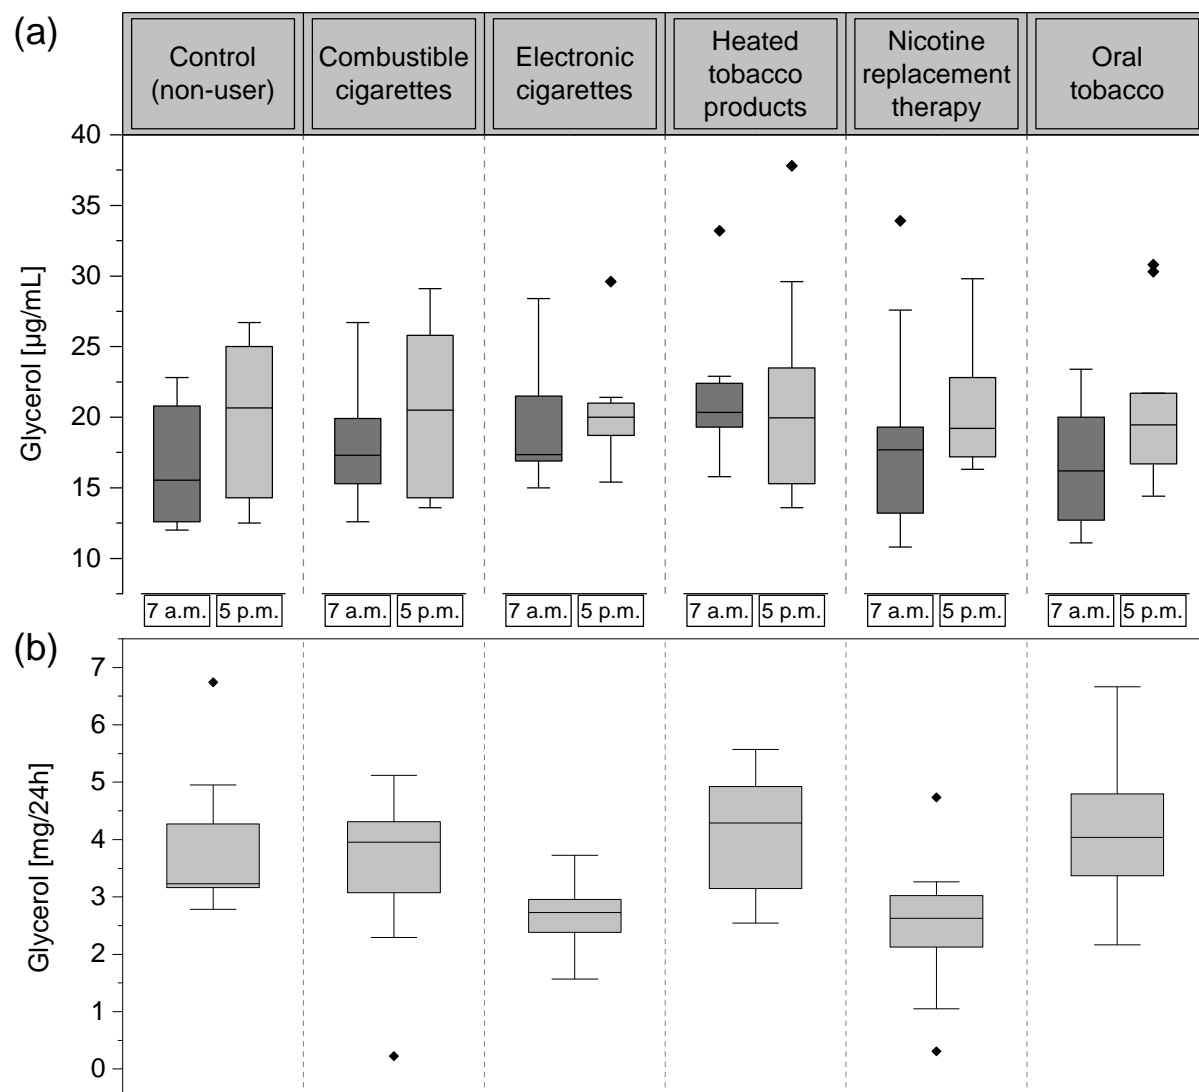

**Figure S2.** Box-and-whisker plots of glycerol (G) on day 3 in (a) plasma [µg/mL] at 7 a.m. and 5 p.m. and (b) urine [mg/24h] between different nicotine product user groups and the control. Box-and-whisker plots represent medians (horizontal lines) with 25 % and 75 % percentiles (boxes), 1.5xIQR (whiskers), and outliers (diamonds).

**Table S2.** Descriptive statistics of glycerol [ $\mu\text{g/mL}$ ] in plasma of study samples for different nicotine user groups

| User group                                            | Day    | Time   | N total | Mean | SD   | Median | Min  | Max  |
|-------------------------------------------------------|--------|--------|---------|------|------|--------|------|------|
| <b>Control<br/>(non-user, NU)</b>                     | Day -1 | 5 p.m. | 10      | 20.4 | 7.7  | 17.45  | 9.9  | 30   |
|                                                       | Day 1  | 7 a.m. | 10      | 19.2 | 3.5  | 17.9   | 14.5 | 26   |
|                                                       |        | 5 p.m. | 10      | 15.5 | 4.1  | 15.1   | 8.78 | 23.5 |
|                                                       | Day 2  | 7 a.m. | 10      | 16.6 | 5.4  | 14.5   | 10.4 | 26   |
|                                                       |        | 5 p.m. | 10      | 23.2 | 5.2  | 21.4   | 17.4 | 32.7 |
|                                                       | Day 3  | 7 a.m. | 10      | 16.7 | 4.2  | 15.55  | 12   | 22.8 |
|                                                       |        | 5 p.m. | 10      | 20.0 | 5.6  | 20.65  | 12.5 | 26.7 |
| <b>Combustible<br/>cigarettes (CC)</b>                | Day -1 | 5 p.m. | 10      | 20.2 | 5.5  | 18.8   | 12.9 | 30.3 |
|                                                       | Day 1  | 7 a.m. | 10      | 20.1 | 4.3  | 20.2   | 14.1 | 27.9 |
|                                                       |        | 5 p.m. | 10      | 17.3 | 2.6  | 17.5   | 12.6 | 20.9 |
|                                                       | Day 2  | 7 a.m. | 10      | 17.2 | 2.9  | 17.4   | 13   | 22.3 |
|                                                       |        | 5 p.m. | 10      | 20.0 | 5.5  | 17.4   | 14.5 | 31.3 |
|                                                       | Day 3  | 7 a.m. | 10      | 17.7 | 4.1  | 17.3   | 12.6 | 26.7 |
|                                                       |        | 5 p.m. | 10      | 20.2 | 5.7  | 20.5   | 13.6 | 29.1 |
| <b>Electronic<br/>cigarettes (EC)</b>                 | Day -1 | 5 p.m. | 10      | 22.7 | 4.1  | 22.6   | 18   | 30.9 |
|                                                       | Day 1  | 7 a.m. | 10      | 20.6 | 6.2  | 18.75  | 13.7 | 36.2 |
|                                                       |        | 5 p.m. | 10      | 19.1 | 4.0  | 18.55  | 15.1 | 28   |
|                                                       | Day 2  | 7 a.m. | 10      | 17.9 | 3.7  | 16.9   | 14   | 24.5 |
|                                                       |        | 5 p.m. | 10      | 22.6 | 4.7  | 22.6   | 14.8 | 29.2 |
|                                                       | Day 3  | 7 a.m. | 10      | 19.5 | 4.7  | 17.35  | 15   | 28.4 |
|                                                       |        | 5 p.m. | 10      | 20.5 | 3.7  | 20     | 15.4 | 29.6 |
| <b>Heated tobacco<br/>products (HTP)</b>              | Day -1 | 5 p.m. | 10      | 24.4 | 10.4 | 21.1   | 16.3 | 51.6 |
|                                                       | Day 1  | 7 a.m. | 10      | 20.4 | 5.2  | 20     | 14   | 31.1 |
|                                                       |        | 5 p.m. | 10      | 19.6 | 6.3  | 18.3   | 14   | 35.9 |
|                                                       | Day 2  | 7 a.m. | 10      | 18.1 | 4.6  | 17.05  | 10.9 | 26.4 |
|                                                       |        | 5 p.m. | 10      | 23.7 | 7.4  | 21.05  | 17.1 | 39.9 |
|                                                       | Day 3  | 7 a.m. | 10      | 21.5 | 4.6  | 20.35  | 15.8 | 33.2 |
|                                                       |        | 5 p.m. | 10      | 21.4 | 7.5  | 19.95  | 13.6 | 37.8 |
| <b>Nicotine<br/>replacement<br/>therapy<br/>(NRT)</b> | Day -1 | 5 p.m. | 10      | 19.1 | 5.5  | 19.95  | 10.4 | 27.9 |
|                                                       | Day 1  | 7 a.m. | 10      | 17.4 | 4.9  | 17.85  | 8.85 | 23.9 |
|                                                       |        | 5 p.m. | 10      | 20.0 | 5.7  | 18.05  | 14.3 | 29.6 |
|                                                       | Day 2  | 7 a.m. | 10      | 19.0 | 5.6  | 16.7   | 12.6 | 28.7 |
|                                                       |        | 5 p.m. | 10      | 18.0 | 5.9  | 16.7   | 11.9 | 32.7 |
|                                                       | Day 3  | 7 a.m. | 10      | 18.8 | 7.1  | 17.7   | 10.8 | 33.9 |
|                                                       |        | 5 p.m. | 10      | 20.7 | 4.9  | 19.2   | 16.3 | 29.8 |
| <b>Oral tobacco<br/>(OT)</b>                          | Day -1 | 5 p.m. | 10      | 20.8 | 7.5  | 19.1   | 11.4 | 32.8 |
|                                                       | Day 1  | 7 a.m. | 10      | 20.3 | 4.5  | 18.55  | 15.4 | 29.8 |
|                                                       |        | 5 p.m. | 10      | 18.5 | 5.2  | 17.35  | 10.6 | 28.6 |
|                                                       | Day 2  | 7 a.m. | 10      | 17.3 | 2.9  | 16.9   | 12.1 | 22.2 |
|                                                       |        | 5 p.m. | 10      | 21.1 | 6.3  | 19.75  | 15.5 | 37.4 |
|                                                       | Day 3  | 7 a.m. | 10      | 16.5 | 4.0  | 16.2   | 11.1 | 23.4 |
|                                                       |        | 5 p.m. | 10      | 20.4 | 5.8  | 19.45  | 14.4 | 30.8 |

**Table S3.** Descriptive statistics of glycerol [mg/24h] in urine of study samples for different nicotine user groups

| User group                                        | Day   | N total | Mean | SD  | Median | Min | Max |
|---------------------------------------------------|-------|---------|------|-----|--------|-----|-----|
| <b>Control<br/>(non-user, NU)</b>                 | Day 1 | 10      | 4.1  | 1.1 | 3.9    | 2.7 | 6.3 |
|                                                   | Day 2 | 10      | 3.5  | 1.1 | 3.3    | 2.0 | 5.3 |
|                                                   | Day 3 | 10      | 3.8  | 1.2 | 3.2    | 2.8 | 6.7 |
| <b>Combustible<br/>cigarettes (CC)</b>            | Day 1 | 10      | 4.3  | 1.1 | 4.4    | 2.0 | 5.9 |
|                                                   | Day 2 | 10      | 4.3  | 0.9 | 4.4    | 2.4 | 5.6 |
|                                                   | Day 3 | 10      | 3.5  | 1.4 | 4.0    | 0.2 | 5.1 |
| <b>Electronic<br/>cigarettes (EC)</b>             | Day 1 | 10      | 3.5  | 1.7 | 3.6    | 1.3 | 6.9 |
|                                                   | Day 2 | 10      | 3.2  | 1.0 | 3.4    | 1.2 | 4.2 |
|                                                   | Day 3 | 10      | 2.8  | 0.6 | 2.7    | 1.6 | 3.7 |
| <b>Heated tobacco<br/>products (HTP)</b>          | Day 1 | 10      | 4.8  | 2.0 | 4.5    | 2.0 | 8.4 |
|                                                   | Day 2 | 10      | 3.7  | 1.5 | 3.0    | 2.0 | 5.7 |
|                                                   | Day 3 | 10      | 4.1  | 1.1 | 4.3    | 2.5 | 5.6 |
| <b>Nicotine<br/>replacement<br/>therapy (NRT)</b> | Day 1 | 10      | 3.3  | 0.9 | 3.4    | 2.1 | 4.7 |
|                                                   | Day 2 | 10      | 2.6  | 1.6 | 2.3    | 0.6 | 5.3 |
|                                                   | Day 3 | 10      | 2.5  | 1.2 | 2.6    | 0.3 | 4.7 |
| <b>Oral tobacco<br/>(OT)</b>                      | Day 1 | 10      | 4.2  | 1.4 | 4.3    | 2.1 | 7.0 |
|                                                   | Day 2 | 10      | 4.4  | 2.4 | 4.2    | 1.3 | 9.8 |
|                                                   | Day 3 | 10      | 4.1  | 1.3 | 4.0    | 2.2 | 6.7 |

SD: Standard deviation, Min: Minimum, Max: Maximum

**Table S4.** Descriptive statistics of 1,2-propylene glycol [ $\mu\text{g/mL}$ ] in plasma of study samples for different nicotine user groups

| User group                                        | Day    | Time   | N total | Mean | SD   | Median | Min  | Max   |
|---------------------------------------------------|--------|--------|---------|------|------|--------|------|-------|
| <b>Control<br/>(non-user, NU)</b>                 | Day -1 | 5 p.m. | 10      | 0.27 | 0.36 | 0.10   | 0.04 | 1.18  |
|                                                   | Day 1  | 7 a.m. | 10      | 0.08 | 0.04 | 0.08   | 0.03 | 0.13  |
|                                                   |        | 5 p.m. | 10      | 0.10 | 0.03 | 0.10   | 0.05 | 0.14  |
|                                                   | Day 2  | 7 a.m. | 10      | 0.05 | 0.02 | 0.05   | 0.02 | 0.07  |
|                                                   |        | 5 p.m. | 10      | 0.09 | 0.02 | 0.10   | 0.06 | 0.13  |
|                                                   | Day 3  | 7 a.m. | 10      | 0.05 | 0.02 | 0.04   | 0.03 | 0.10  |
|                                                   |        | 5 p.m. | 10      | 0.09 | 0.02 | 0.09   | 0.05 | 0.12  |
| <b>Combustible<br/>cigarettes (CC)</b>            | Day -1 | 5 p.m. | 10      | 0.42 | 0.91 | 0.12   | 0.07 | 3.00  |
|                                                   | Day 1  | 7 a.m. | 10      | 0.09 | 0.05 | 0.07   | 0.03 | 0.17  |
|                                                   |        | 5 p.m. | 10      | 0.11 | 0.04 | 0.10   | 0.06 | 0.17  |
|                                                   | Day 2  | 7 a.m. | 10      | 0.08 | 0.04 | 0.07   | 0.04 | 0.17  |
|                                                   |        | 5 p.m. | 10      | 0.13 | 0.05 | 0.12   | 0.06 | 0.25  |
|                                                   | Day 3  | 7 a.m. | 10      | 0.08 | 0.04 | 0.06   | 0.04 | 0.17  |
|                                                   |        | 5 p.m. | 10      | 0.12 | 0.03 | 0.12   | 0.08 | 0.19  |
| <b>Electronic<br/>cigarette (EC)</b>              | Day -1 | 5 p.m. | 10      | 7.20 | 4.73 | 5.67   | 0.71 | 16.60 |
|                                                   | Day 1  | 7 a.m. | 10      | 1.75 | 2.32 | 0.78   | 0.29 | 7.59  |
|                                                   |        | 5 p.m. | 10      | 9.76 | 7.83 | 7.29   | 1.27 | 26.90 |
|                                                   | Day 2  | 7 a.m. | 10      | 1.45 | 1.68 | 0.65   | 0.19 | 5.61  |
|                                                   |        | 5 p.m. | 10      | 8.83 | 7.68 | 5.89   | 2.48 | 26.20 |
|                                                   | Day 3  | 7 a.m. | 10      | 1.25 | 1.01 | 0.78   | 0.25 | 2.95  |
|                                                   |        | 5 p.m. | 10      | 8.37 | 8.88 | 5.47   | 2.38 | 31.90 |
| <b>Heated tobacco<br/>products (HTP)</b>          | Day -1 | 5 p.m. | 10      | 0.83 | 1.95 | 0.06   | 0.03 | 6.34  |
|                                                   | Day 1  | 7 a.m. | 10      | 0.09 | 0.05 | 0.08   | 0.03 | 0.19  |
|                                                   |        | 5 p.m. | 10      | 0.11 | 0.03 | 0.11   | 0.07 | 0.15  |
|                                                   | Day 2  | 7 a.m. | 10      | 0.05 | 0.02 | 0.04   | 0.03 | 0.09  |
|                                                   |        | 5 p.m. | 10      | 0.11 | 0.04 | 0.11   | 0.05 | 0.19  |
|                                                   | Day 3  | 7 a.m. | 10      | 0.07 | 0.04 | 0.05   | 0.03 | 0.15  |
|                                                   |        | 5 p.m. | 10      | 0.11 | 0.04 | 0.11   | 0.05 | 0.17  |
| <b>Nicotine<br/>replacement<br/>therapy (NRT)</b> | Day -1 | 5 p.m. | 10      | 0.57 | 0.92 | 0.17   | 0.04 | 3.00  |
|                                                   | Day 1  | 7 a.m. | 10      | 0.08 | 0.05 | 0.07   | 0.02 | 0.16  |
|                                                   |        | 5 p.m. | 10      | 0.14 | 0.11 | 0.09   | 0.06 | 0.36  |
|                                                   | Day 2  | 7 a.m. | 10      | 0.09 | 0.06 | 0.07   | 0.03 | 0.20  |
|                                                   |        | 5 p.m. | 10      | 0.14 | 0.10 | 0.12   | 0.04 | 0.40  |
|                                                   | Day 3  | 7 a.m. | 10      | 0.08 | 0.07 | 0.06   | 0.02 | 0.22  |
|                                                   |        | 5 p.m. | 10      | 0.15 | 0.17 | 0.08   | 0.04 | 0.59  |
| <b>Oral tobacco<br/>(OT)</b>                      | Day -1 | 5 p.m. | 10      | 0.41 | 0.47 | 0.14   | 0.03 | 1.36  |
|                                                   | Day 1  | 7 a.m. | 10      | 0.11 | 0.06 | 0.09   | 0.04 | 0.23  |
|                                                   |        | 5 p.m. | 10      | 0.20 | 0.13 | 0.18   | 0.07 | 0.51  |
|                                                   | Day 2  | 7 a.m. | 10      | 0.10 | 0.05 | 0.09   | 0.04 | 0.22  |
|                                                   |        | 5 p.m. | 10      | 0.21 | 0.16 | 0.16   | 0.08 | 0.60  |
|                                                   | Day 3  | 7 a.m. | 10      | 0.11 | 0.04 | 0.10   | 0.06 | 0.20  |
|                                                   |        | 5 p.m. | 10      | 0.19 | 0.12 | 0.19   | 0.07 | 0.43  |



**Table S5.** Descriptive statistics of PG [mg/24h] in urine of study samples for different nicotine user groups

| User group                                        | Day   | N total | Mean | SD    | Median | Min  | Max   |
|---------------------------------------------------|-------|---------|------|-------|--------|------|-------|
| <b>Control<br/>(non-user, NU)</b>                 | Day 1 | 10      | 1.8  | 1.2   | 1.5    | 0.6  | 4.7   |
|                                                   | Day 2 | 10      | 1.4  | 0.4   | 1.5    | 0.8  | 2.0   |
|                                                   | Day 3 | 10      | 1.5  | 0.4   | 1.5    | 1.0  | 2.1   |
| <b>Combustible<br/>cigarettes (CC)</b>            | Day 1 | 10      | 2.8  | 4.2   | 1.4    | 1.1  | 14.7  |
|                                                   | Day 2 | 10      | 1.7  | 0.4   | 1.6    | 1.3  | 2.4   |
|                                                   | Day 3 | 10      | 1.8  | 0.5   | 1.7    | 1.0  | 2.7   |
| <b>Electronic<br/>cigarettes (EC)</b>             | Day 1 | 10      | 86.1 | 73.2  | 59.5   | 13.4 | 226.9 |
|                                                   | Day 2 | 10      | 96.1 | 88.8  | 67.5   | 19.3 | 303.5 |
|                                                   | Day 3 | 10      | 95.4 | 107.1 | 77.6   | 12.7 | 380.7 |
| <b>Heated tobacco<br/>products (HTP)</b>          | Day 1 | 10      | 3.9  | 5.6   | 2.2    | 1.2  | 19.7  |
|                                                   | Day 2 | 10      | 2.0  | 1.1   | 1.6    | 1.1  | 4.6   |
|                                                   | Day 3 | 10      | 2.1  | 1.5   | 1.6    | 0.9  | 5.9   |
| <b>Nicotine<br/>replacement<br/>therapy (NRT)</b> | Day 1 | 10      | 2.2  | 1.6   | 2.1    | 0.2  | 5.1   |
|                                                   | Day 2 | 10      | 1.6  | 1.7   | 1.0    | 0.2  | 5.9   |
|                                                   | Day 3 | 10      | 1.7  | 2.3   | 1.1    | 0.4  | 8.1   |
| <b>Oral tobacco<br/>(OT)</b>                      | Day 1 | 10      | 3.9  | 4.2   | 2.8    | 0.9  | 15.2  |
|                                                   | Day 2 | 10      | 3.6  | 3.4   | 2.8    | 0.9  | 12.7  |
|                                                   | Day 3 | 10      | 3.3  | 2.3   | 3.0    | 1.1  | 8.7   |

SD: Standard deviation, Min: Minimum, Max: Maximum

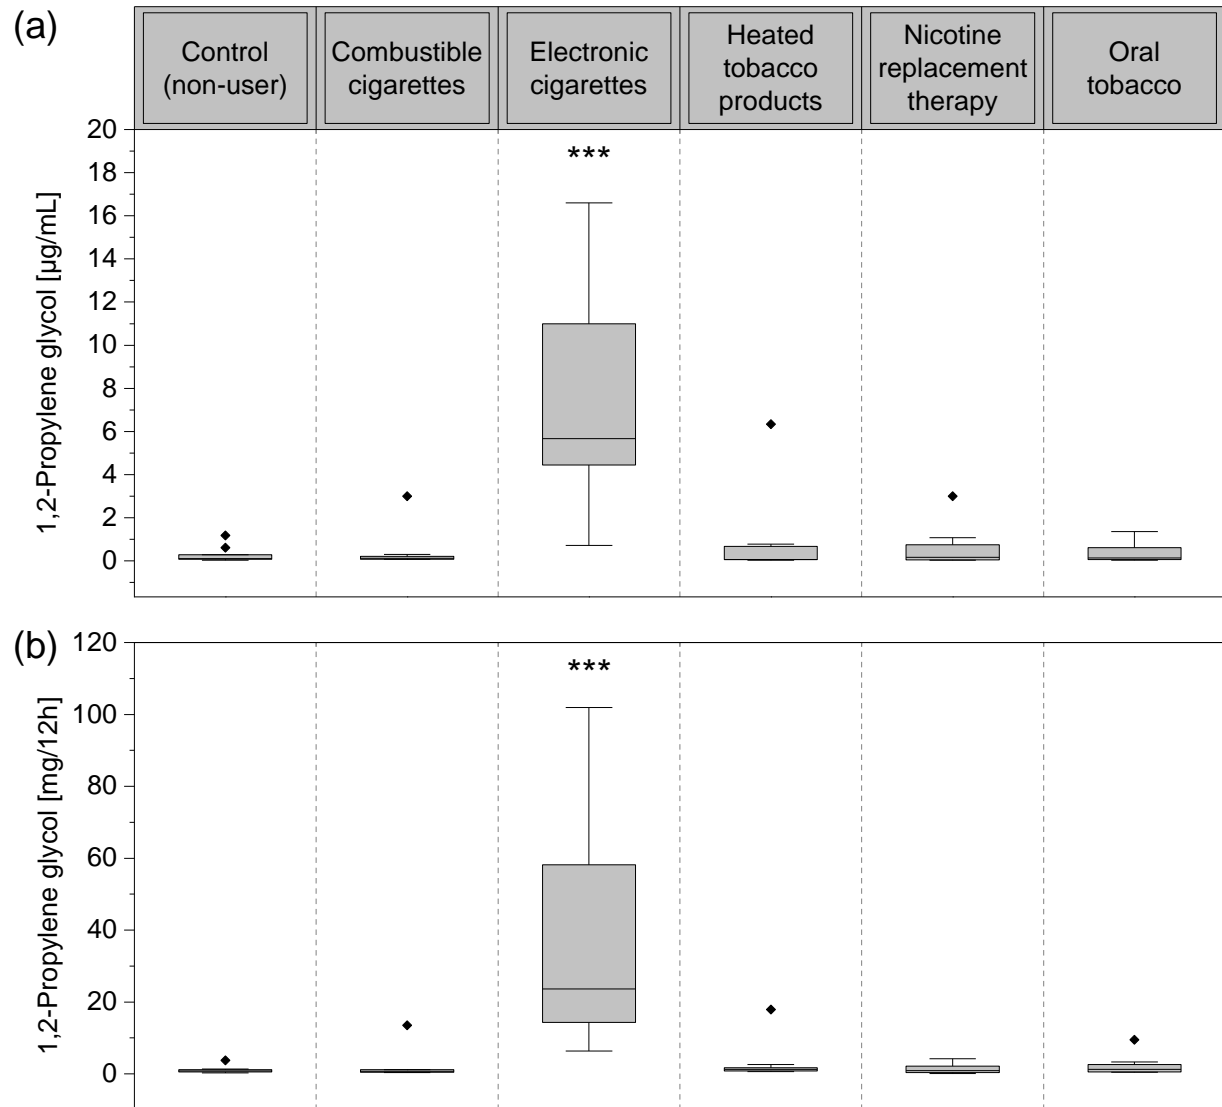

**Figure S3.** Box-and-whisker plot of 1,2-propylene glycol (PG) on day -1 in (a) plasma [ $\mu\text{g/mL}$ ] at 5 pm (B0) and (b) urine [ $\text{mg/12h}$ ] (U0) between different nicotine product user groups and the control. Box-and-whisker plots represent medians (horizontal lines) with 25 % and 75 % percentiles (boxes), 1.5xIQR (whiskers), and outliers (diamonds). \*\*\*  $p < 0.01$  (comparison of EC vs all other groups).

**Table S6.** Descriptive statistics of PG in urine [mg/12h] and plasma [ $\mu\text{g/mL}$ ] of study samples for different nicotine user groups at day -1

| <b>Matrix</b>          | <b>User group</b>                  | <b>N total</b> | <b>Mean</b> | <b>SD</b> | <b>Median</b> | <b>Min</b> | <b>Max</b> |
|------------------------|------------------------------------|----------------|-------------|-----------|---------------|------------|------------|
| <b>Urine<br/>(U0)</b>  | Control (non-user, NU)             | 10             | 1.1         | 1.0       | 0.3           | 0.8        | 3.8        |
|                        | Combustible cigarettes (CC)        | 10             | 2.0         | 4.1       | 0.4           | 0.7        | 13.6       |
|                        | Electronic cigarettes (EC)         | 10             | 35.5        | 30.3      | 6.4           | 23.6       | 101.9      |
|                        | Heated tobacco products (HTP)      | 10             | 2.9         | 5.3       | 0.6           | 1.3        | 17.9       |
|                        | Nicotine replacement therapy (NRT) | 10             | 1.4         | 1.3       | 0.1           | 0.9        | 4.2        |
|                        | Oral tobacco (OT)                  | 10             | 2.2         | 2.7       | 0.5           | 1.2        | 9.5        |
| <b>Plasma<br/>(B0)</b> | Control (non-user, NU)             | 10             | 0.27        | 0.36      | 0.10          | 0.04       | 1.18       |
|                        | Combustible cigarettes (CC)        | 10             | 0.42        | 0.91      | 0.12          | 0.07       | 3.00       |
|                        | Electronic cigarettes (EC)         | 10             | 7.20        | 4.73      | 5.67          | 0.71       | 16.60      |
|                        | Heated tobacco products (HTP)      | 10             | 0.83        | 1.95      | 0.06          | 0.03       | 6.34       |
|                        | Nicotine replacement therapy (NRT) | 10             | 0.57        | 0.92      | 0.17          | 0.04       | 3.00       |
|                        | Oral tobacco (OT)                  | 10             | 0.41        | 0.47      | 0.14          | 0.03       | 1.36       |

SD: Standard deviation, Min: Minimum, Max: Maximum
